# Supplementary material for: Prognostic evaluation of esophageal cancer patients with stages I-III
Source: publisher site journal article supplement (doi:10.18632/aging.103532), 2020-07-23
Supplement: Supplementary file [file aging-v12i14-103532-supplementary-material-SD1.pdf]

# SUPPLEMENTARY FIGURE

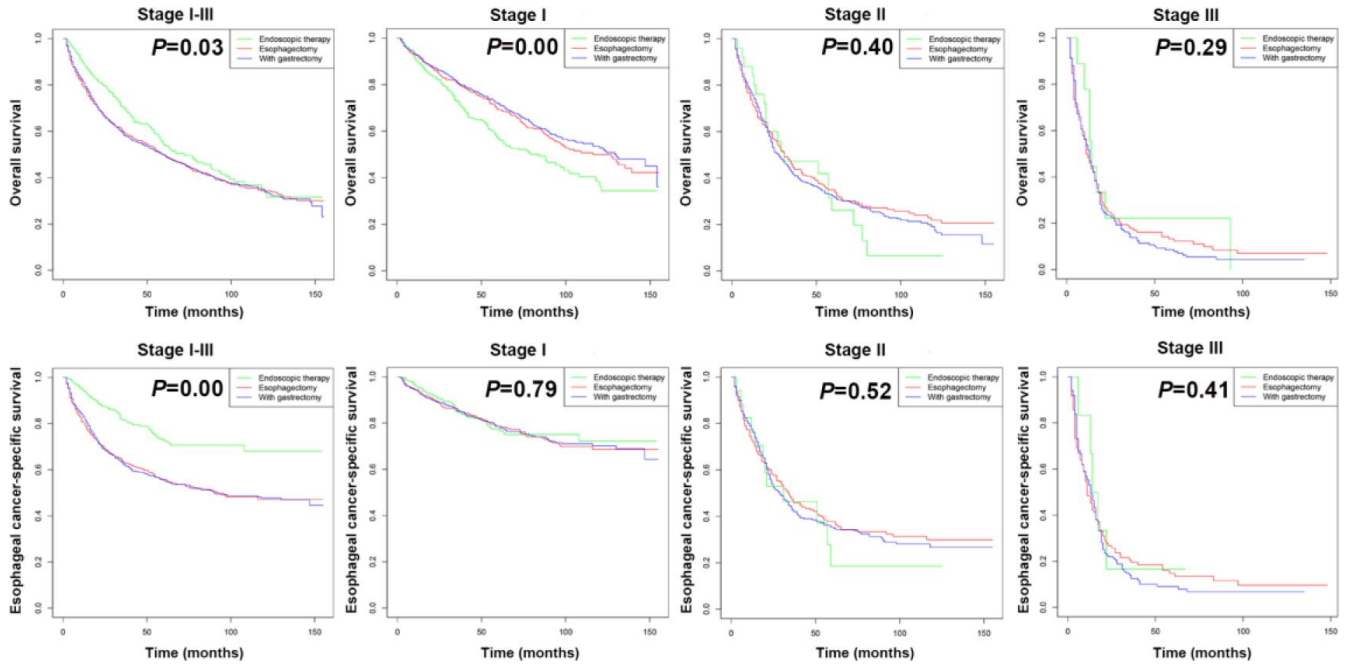

Supplementary Figure 1. Kaplan-Meier survival analyses for overall survival and esophageal cancer-specific survival in stages I-III and each stage of esophageal cancer based on three surgical methods.
