# Supplementary material for: Prognostic evaluation of esophageal cancer patients with stages I-III
Source: publisher site journal article supplement (doi:10.18632/aging.103532), 2020-07-23
Supplement: Supplementary file [file aging-v12i14-103532-supplementary-material-SD2.pdf]

## SUPPLEMENTARY TABLE

Supplementary Table 1. Characteristics of esophageal cancer patients with stages I-III (n=7,433).

| Characteristics               | No. of Patient (%) |
|-------------------------------|--------------------|
| Age (years)                   |                    |
| <50                           | 282 (3.79)         |
| 50-59                         | 1098 (14.77)       |
| 60-69                         | 1951 (26.25)       |
| 70-79                         | 2159 (29.05)       |
| 80≤                           | 1943 (26.14)       |
| Sex                           |                    |
| Female                        | 1870 (25.15)       |
| Male                          | 5564 (74.85)       |
| ICD-O-3 Hist/Behav, malignant |                    |
| Squamous cell carcinoma       | 2771 (37.28)       |
| Adenocarcinoma                | 4662 (62.72)       |
| AJCC Staging Group, 6th ed    |                    |
| I                             | 4166 (56.05)       |
| II                            | 1760 (23.68)       |
| III                           | 1507 (20.27)       |
